# Supplementary material for: Transcriptome Sequencing and De Novo Assembly of Golden Cuttlefish Sepia esculenta Hoyle
Source: Int J Mol Sci. 2016 Oct 22;17(10):1749. doi: 10.3390/ijms17101749 (PMC5085775; doi:10.3390/ijms17101749)
Supplement: Supplementary file 1 [file ijms-17-01749-s001.pdf]

# Supplementary Materials: Transcriptome Sequencing and De Novo Assembly of Golden Cuttlefish *Sepia esculenta* Hoyle

Changlin Liu, Fazhen Zhao, Jing-ping Yan, Chun-sheng Liu, Siwei Liu and Siqing Chen

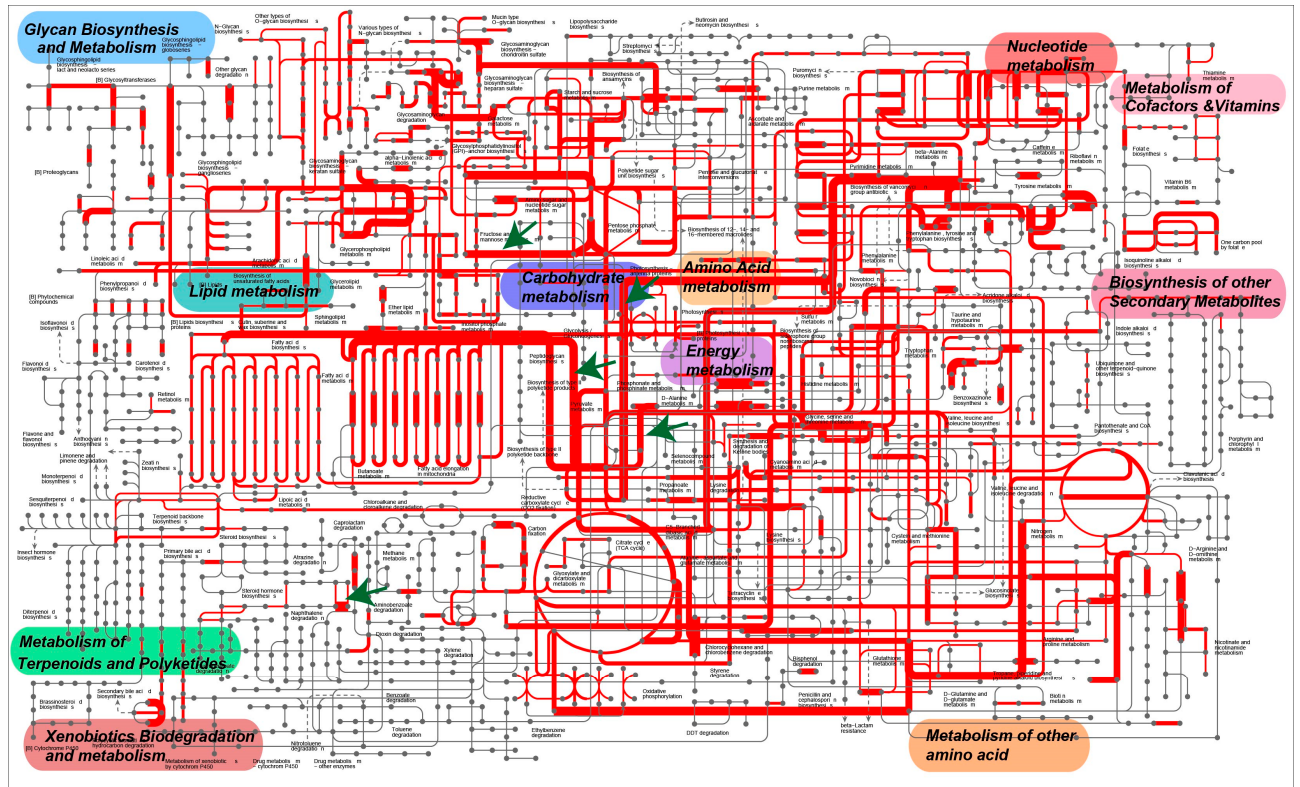

**Figure S1.** Metabolic pathways in KEGG encoded by unigenes and gene dose of individual KO ID. The metabolic enzymes encoded by expanded copies of unigenes were indicated with green arrows.
